# Supplementary material for: Optimization of secretion and surface localization of heterologous OVA protein in mycobacteria by using LipY as a carrier
Source: PubMed Central journal article supplement (PMC6402100; doi:10.1186/s12934-019-1093-1), 2019-03-06

|             |    |    |    |    |   |
|-------------|----|----|----|----|---|
| LipY domain | wt | wt | 1  | 3  |   |
| OVA domain  | 1  | 3  | wt | wt | - |

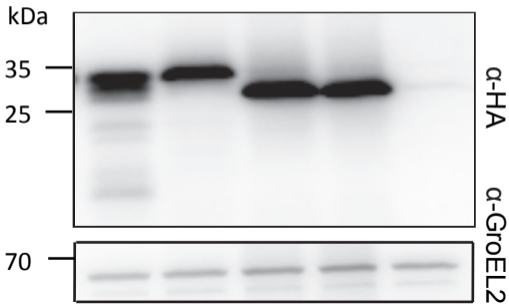

Supplement: 12934_2019_1093_MOESM2_ESM.pdf [file 12934_2019_1093_MOESM2_ESM.pdf]
